# Supplementary material for: An investigation into atmospheric nitrous acid (HONO) processes in South Korea
Source: Copernicus journal article supplement (doi:10.5194/acp-24-12575-2024), 2024-11-14
Supplement: Supplementary file 1 [file acp-24-12575-2024-supplement.pdf]

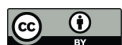

*Supplement of*

## **An investigation into atmospheric nitrous acid (HONO) processes in South Korea**

**Kiyeon Kim et al.**

*Correspondence to:* Kyung Man Han (kmhan@gist.ac.kr) and Chul Han Song (chsong@gist.ac.kr)

The copyright of individual parts of the supplement might differ from the article licence.

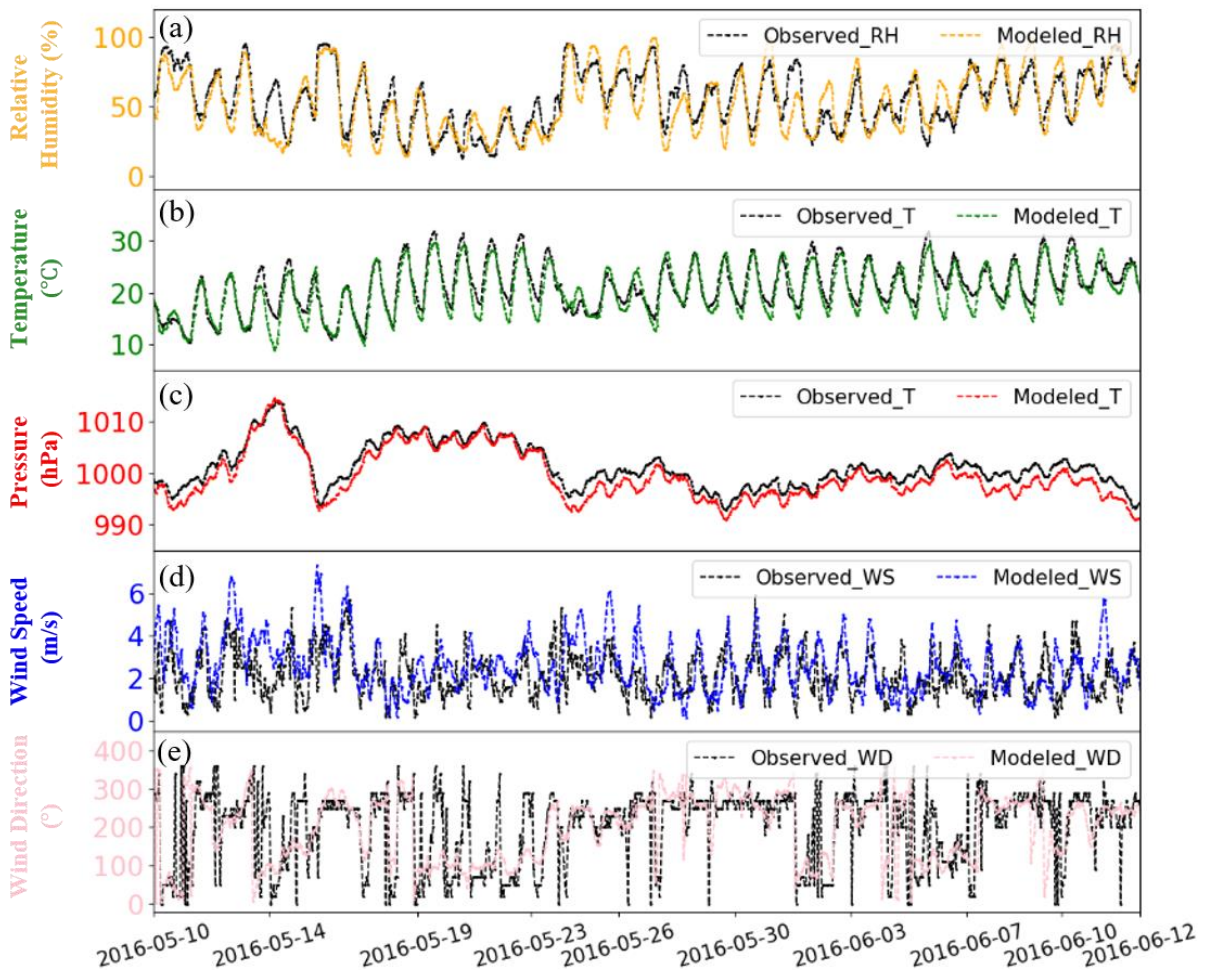

22

23 **Fig. S1.** Temporal variations of (a) relative humidity (RH); (b) temperature (T); (c) pressure;  
 24 (d) wind speed (WS) at 10m above the surface; and (e) wind direction (WD) at 10m above the  
 25 surface during period of the KORUS-AQ campaign.

26

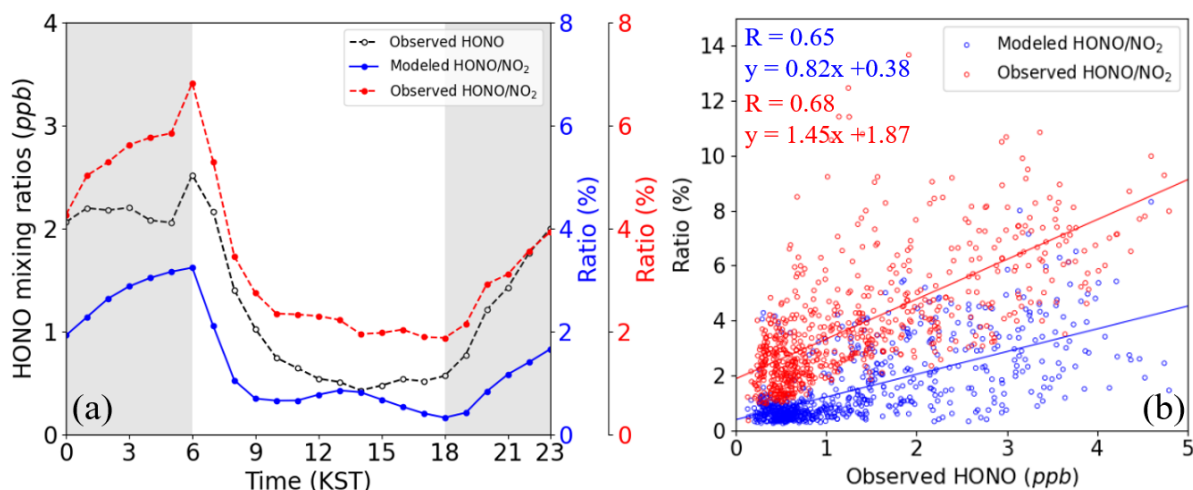

27

28 **Fig. S2.** (a) Diurnal variations of observed HONO (black open circles, left y-axis), modeled  
 29 HONO to NO<sub>2</sub> ratio (blue line, right y-axis), and observed HONO to NO<sub>2</sub> ratio (red line, right  
 30 y-axis) and (b) their scatter-plots between the observed HONO and the modeled ratio of HONO  
 31 to NO<sub>2</sub> (blue circles), and observed HONO to NO<sub>2</sub> (red circles) at the Olympic Park station  
 32 during the period of the KORUS-AQ campaign.

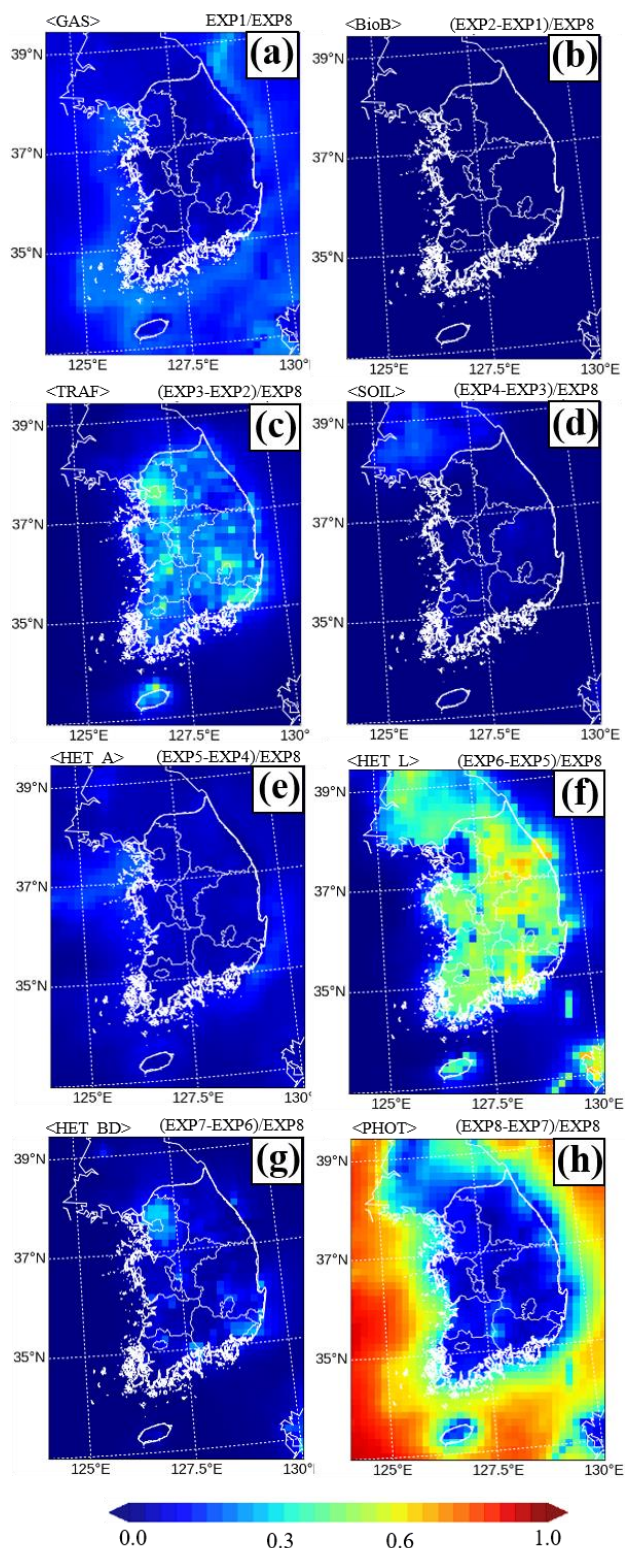

33

34 **Fig. S3.** Incremental ratio of (a) gas phase reactions; (b) biomass burning emissions; (c) traffic  
 35 emissions and (d) soil emissions; (e) heterogeneous reactions on the aerosol surfaces, (f)  
 36 heterogeneous reactions on the leaf surfaces, and (g) heterogeneous reactions on the building  
 37 surfaces; and (h) renoxification on HONO mixing ratios (unit: dimensionless).

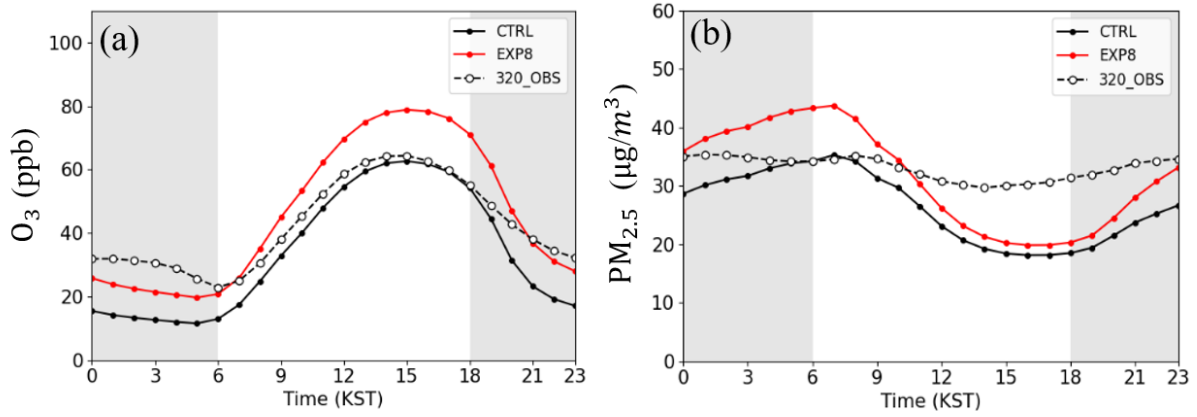

38

39 **Fig. S4.** Comparison of diurnal variations of the mixing ratios of (a) O<sub>3</sub>, and (b) PM<sub>2.5</sub>. Both  
 40 are averaged for 320 AIR KOREA monitoring stations during the period of the KORUS-AQ  
 41 campaign. The black open circles, black lines, and red lines represent observed values and  
 42 values from the CTRL and EXP8 simulations, respectively.



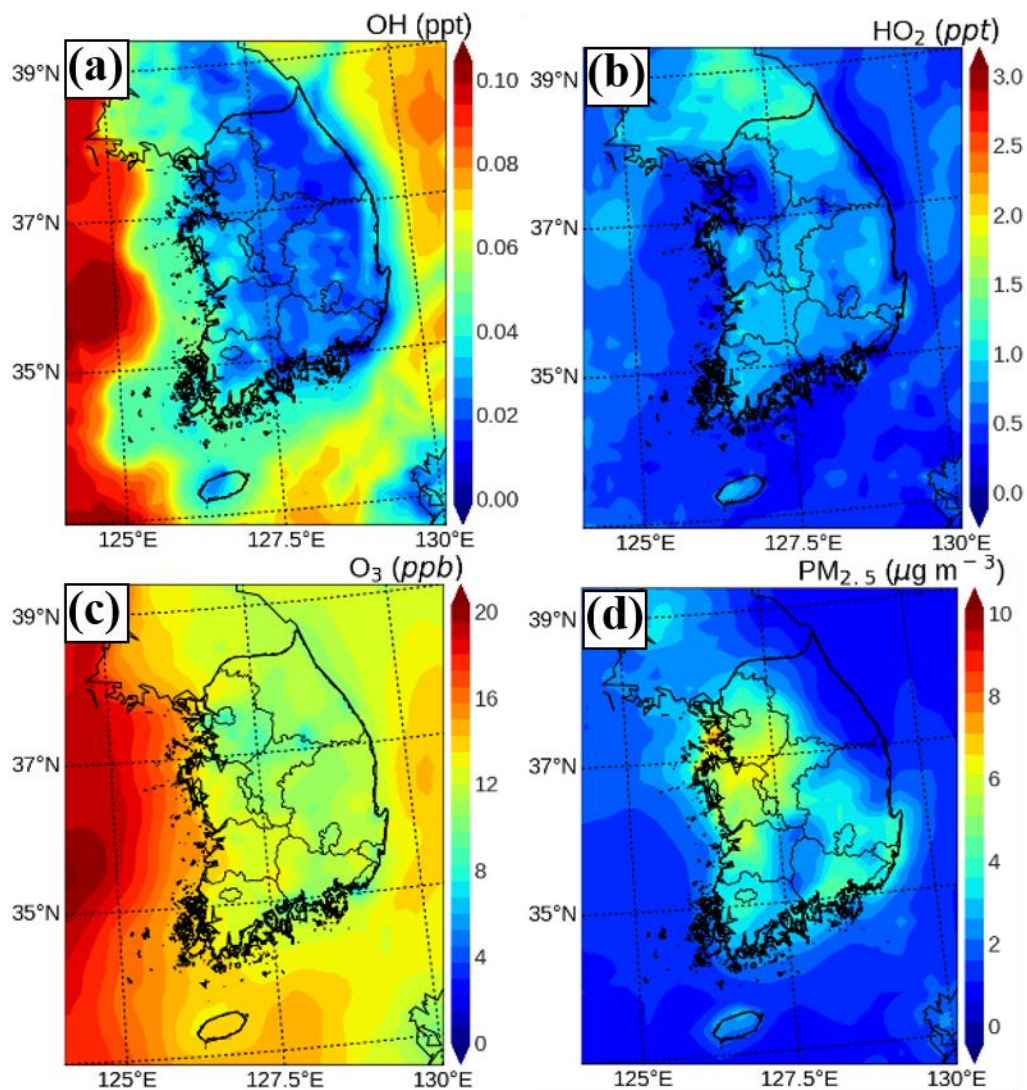

43

44 **Fig. S5.** Spatial distributions of the differences levels of (a) HONO, (b) OH, (c) HO<sub>2</sub>, and (d)  
 45 PM<sub>2.5</sub> between the EXP8 and CTRL simulations in South Korea during the period of the  
 46 KORUS-AQ campaign.

47 **Table S1.** Detection limits and uncertainties of instruments for observed HONO, NO<sub>2</sub>, O<sub>3</sub>, and  
 48 PM<sub>2.5</sub> at Olympic Park station, Korea.

| <b>Species</b>    | <b>Instruments</b>                                                    | <b>Detection limit</b> | <b>Uncertainty</b> | <b>Time resolution</b> |
|-------------------|-----------------------------------------------------------------------|------------------------|--------------------|------------------------|
| HONO              | Monitor for Aerosols and Gases in Ambient Air (MARGA, model ADI 2080) | 0.02ppbv               | ±20%               | 1 hour                 |
| NO <sub>2</sub>   | Ecotech gas sensor, EC8941                                            | 0.5ppbv                | ±10%               | 1 hour                 |
| O <sub>3</sub>    | Ecotech gas sensor, EC9810                                            | 0.5ppbv                | ±5%                | 1 hour                 |
| PM <sub>2.5</sub> | Thermo Fisher Scientific, FH62C14                                     | 4µg/m <sup>3</sup>     | ±10%               | 1 hour                 |

49

50 **Table S2.** Statistical analysis of modeled and observed meteorological parameters at the  
51 Olympic Park station during the period of the KORUS-AQ campaign.

| Parameter               | Observed mean | Modeled mean | R    | RMSE  | MB    | IOA  |
|-------------------------|---------------|--------------|------|-------|-------|------|
| RH (%)                  | 55.81         | 53.33        | 0.85 | 11.95 | -2.48 | 0.92 |
| T (°C )                 | 21.27         | 20.28        | 0.93 | 1.96  | -0.99 | 0.96 |
| Pressure (hPa)          | 1001.38       | 999.62       | 0.98 | 2.01  | -1.77 | 0.95 |
| WS (m s <sup>-1</sup> ) | 2.14          | 2.65         | 0.47 | 1.30  | 0.51  | 0.66 |
| WD (°)                  | 202.71        | 196.01       | 0.53 | 88.87 | -6.70 | 0.75 |

52
